# Supplementary material
Source: PubMed Central journal article supplement (PMC7117790)
Supplement: NIHMS1549510-supplement-Supplemental_Material.pdf [file NIHMS1549510-supplement-Supplemental_Material.pdf]

## SUPPLEMETNAL MATERIAL

### Appendix to Variation in Published Stroke Rates Results in Wide Variation in the Net Clinical Benefit of Anticoagulation for Atrial Fibrillation

|   |                                                                 |   |
|---|-----------------------------------------------------------------|---|
| 1 | Section 1: Model Structure .....                                | 2 |
| 2 | Overview .....                                                  | 2 |
| 3 | Scoring Details for CHA <sub>2</sub> DS <sub>2</sub> -VASc..... | 3 |
| 4 | Scoring details for ATRIA stroke score .....                    | 3 |
| 5 | Scoring Details for HAS-BLED.....                               | 4 |
| 6 | Appendix Figure 1: Markov with Health States.....               | 5 |
| 7 | Appendix Figure 2: Markov Decision Tree .....                   | 6 |
| 8 | References .....                                                | 7 |

# 1 Section 1: Model Structure

## 2 Overview

3 The Markov model contains 29 states of health. **Appendix Figure 1** shows the 7 strategies  
4 compared – no antithrombotic therapy, aspirin, warfarin (target INR 2-3), dabigatran, apixaban,  
5 rivaroxaban, and edoxaban – at the solid black, square decision node. In this analysis, we  
6 present results of the no antithrombotic therapy, warfarin (target INR 2-3), and apixaban  
7 strategies. The bracket after the 7 treatment strategies indicates that the sub-trees are attached  
8 to each strategy. A simplified list of the Markov states is shown next at the Markov node. The  
9 actual model contains 29 states. Many of the states not shown in this figure are additional  
10 combination states for several events, such as short-term symptoms after intracerebral  
11 hemorrhage and long-term symptoms after embolism, or temporary states that last a single  
12 cycle, such as the first month after an intracerebral hemorrhage or ischemic stroke. In addition,  
13 there are separate states for each level of functional outcome after intracerebral hemorrhage  
14 (that is, Glasgow Outcome Scale score of 3, 4, or 5). At the beginning of the Markov, patients  
15 start in the state appropriate to the treatment strategy (e.g., those receiving warfarin start in the  
16 state, “Well on Warfarin,” while those not receiving therapy start in the state, “Well off Warfarin.”)

17 **Appendix Figure 2** illustrates the chance events that may occur during each monthly  
18 cycle. We denote choice events with solid black and chance nodes with circles. Patients face  
19 the same chance events during each monthly cycle of the simulation. Patient-specific decision  
20 analyses are performed by setting parameter values for these chance events based upon a  
21 given patient’s risk profile for ischemic stroke due to AF, major extracranial hemorrhage, and  
22 intracerebral hemorrhage, as well as the choice of treatment. Chance events include  
23 thromboembolism and major bleeding events (intracerebral hemorrhage, subdural hematoma,  
24 or non-central nervous system bleeding). After both types of events, patients face death,  
25 permanent symptoms (severe or mild), or resolution of symptoms. Finally, patients may die from  
26 non-explicitly modeled causes (for example, demographic characteristics; age, gender; or

1 excess risk for death following a stroke or intracerebral hemorrhage; or excess mortality risk due  
2 to major comorbid diseases such as type II diabetes, congestive heart failure, or hypertension).  
3 At the end of each monthly cycle, there is a new distribution across the health states shown at  
4 the Markov node that reflects the effect of the initial intervention and outcomes of subsequent  
5 chance events.

### 6 Scoring Details for CHA<sub>2</sub>DS<sub>2</sub>-VASc

7 Predicted ischemic stroke risk in patients with nonvalvular atrial fibrillation can be  
8 quantified by the CHA<sub>2</sub>DS<sub>2</sub>-VASc scoring algorithm. CHA<sub>2</sub>DS<sub>2</sub>-VASc assigns 1 point for each of  
9 the following risk factors: Congestive heart failure, Hypertension, Age 65 - 74, Diabetes,  
10 Vascular disease (prior myocardial infarction, peripheral arterial disease, or aortic plaque), and  
11 female sex category. Two points are assigned for a history of stroke or transient ischemic  
12 attack, and Age ≥ 75 years. We present the corresponding ischemic stroke risk in the main  
13 manuscript, Table 1.

### 14 Scoring details for ATRIA stroke score

15 While the CHA<sub>2</sub>DS<sub>2</sub>-VASc score is used in clinical guidelines, it does not perform as  
16 well as the ATRIA stroke score.(1,2) The ATRIA stroke score accounts for the following risk  
17 factors: age, prior stroke, sex, diabetes, congestive heart failure, hypertension, proteinuria, and  
18 end-stage renal disease or estimated glomerular filtration rate of less than 45 mL/min/1.73m<sup>2</sup>.  
19 The scoring system assigns different points to age based on whether the patient has had a prior  
20 stroke or not. The table below displays the scoring system.

| Risk factor              | Points without prior stroke | Points with prior stroke |
|--------------------------|-----------------------------|--------------------------|
| Age                      |                             |                          |
| 85+                      | 6                           | 9                        |
| 75 to 84                 | 5                           | 7                        |
| 65 to 74                 | 3                           | 7                        |
| < 65                     | 0                           | 8                        |
| Female                   | 1                           | 1                        |
| Diabetes                 | 1                           | 1                        |
| Congestive heart failure | 1                           | 1                        |

|                   |   |   |
|-------------------|---|---|
| Hypertension      | 1 | 1 |
| Proteinuria       | 1 | 1 |
| eGFR < 45 or ESRD | 1 | 1 |

1  
2

### 3 Scoring Details for HAS-BLED

4 Predicted risk of major bleeding in patients with nonvalvular atrial fibrillation receiving  
5 treatment with warfarin can be quantified by the HAS-BLED scoring algorithm. HAS-BLED  
6 assigns 1 point for each of the following risk factors: poorly controlled Hypertension (systolic  
7 blood pressure  $\geq$  160 mmHg), Abnormal renal or liver function (one point each – renal  
8 transplantation or dialysis, or serum creatinine  $\geq$  2.26 mg/dl or 200  $\mu$ mol/L; chronic hepatitis or  
9 biochemical evidence of significant hepatic derangement – bilirubin  $>$  2 x upper limit of normal in  
10 conjunction with AST/ALT  $>$  3 x upper limit of normal), Stroke history, Bleeding history (history  
11 of previous bleed or predisposition to bleeding, Labile INR (time in therapeutic range  $<$  60%),  
12 Elderly (age  $\geq$  65), Drugs or alcohol (one point each – alcohol abuse, or concomitant use of  
13 antiplatelet or non-steroidal anti-inflammatory drugs). Because this analysis focuses on patients  
14 with incident AF, we do not include information on labile INR. In addition, reliable information on  
15 drug (specifically over-the-counter NSAIDs) and alcohol use are not available for the ATRIA-  
16 CVRN cohort. We present the corresponding hemorrhage risk in the main manuscript Table 1.

1 Appendix Figure 1: Markov with Health States

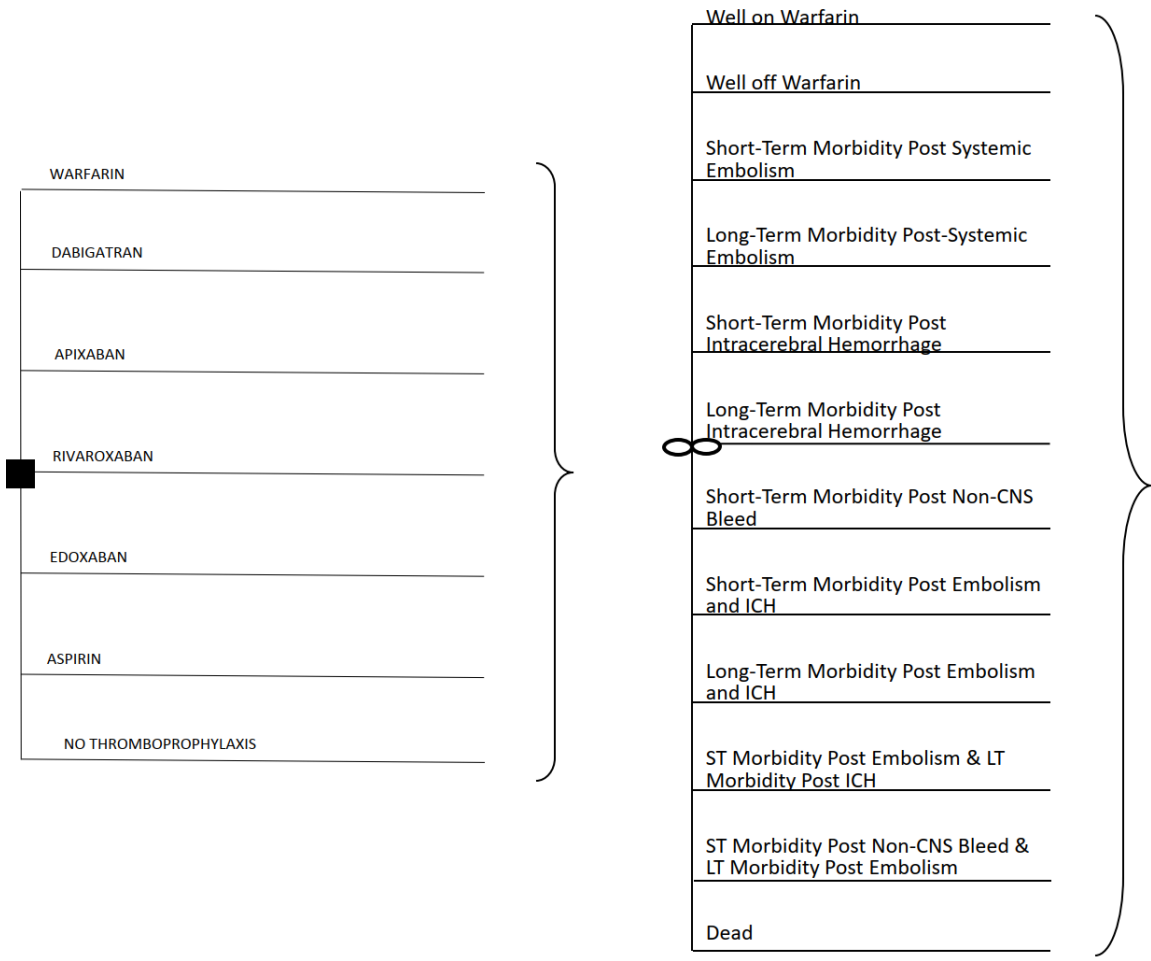

2

1 Appendix Figure 2: Markov Decision Tree

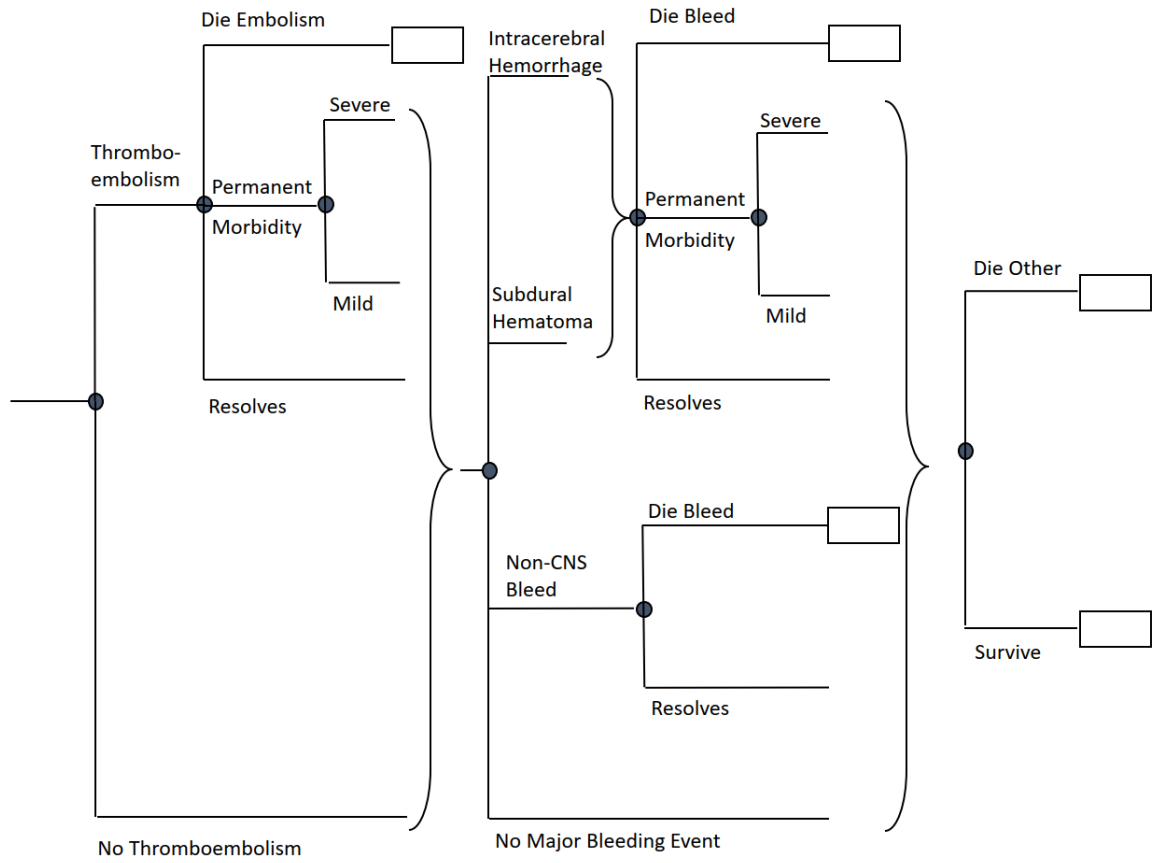

## References

1. January CT, Wann LS, Calkins H, Chen LY, Cigarroa JE, Cleveland JC, et al. 2019 AHA/ACC/HRS Focused Update of the 2014 AHA/ACC/HRS Guideline for the Management of Patients With Atrial Fibrillation: A Report of the American College of Cardiology/American Heart Association Task Force on Clinical Practice Guidelines and the Heart Rhythm Society. *Circulation* [Internet]. 2019 Jan 28 [cited 2019 Jun 12]; Available from: <https://www.ahajournals.org/doi/10.1161/CIR.0000000000000665>
2. Singer DE, Chang Y, Borowsky LH, Fang MC, Pomernacki NK, Udaltsova N, et al. A New Risk Scheme to Predict Ischemic Stroke and Other Thromboembolism in Atrial Fibrillation: The ATRIA Study Stroke Risk Score. *J Am Heart Assoc*. 2013 Jun 18;2(3):e000250.
3. van den Ham HA, Klungel OH, Singer DE, Leufkens HGM, van Staa TP. Comparative Performance of ATRIA, CHADS2, and CHA2DS2-VASc Risk Scores Predicting Stroke in Patients With Atrial Fibrillation. *J Am Coll Cardiol*. 2015 Oct 27;66(17):1851–9.
4. Aspberg S, Chang Y, Atterman A, Bottai M, Go AS, Singer DE. Comparison of the ATRIA, CHADS2, and CHA2DS2-VASc stroke risk scores in predicting ischaemic stroke in a large Swedish cohort of patients with atrial fibrillation. *Eur Heart J*. 2016 Nov 7;37(42):3203–10.

17
